# Supplementary material for: Extracellular vesicles isolated from patients undergoing remote ischemic preconditioning decrease hypoxia-evoked apoptosis of cardiomyoblasts after isoflurane but not propofol exposure
Source: PubMed Central journal article supplement (PMC7021285; doi:10.1371/journal.pone.0228948), 2020-02-14

Figure 3

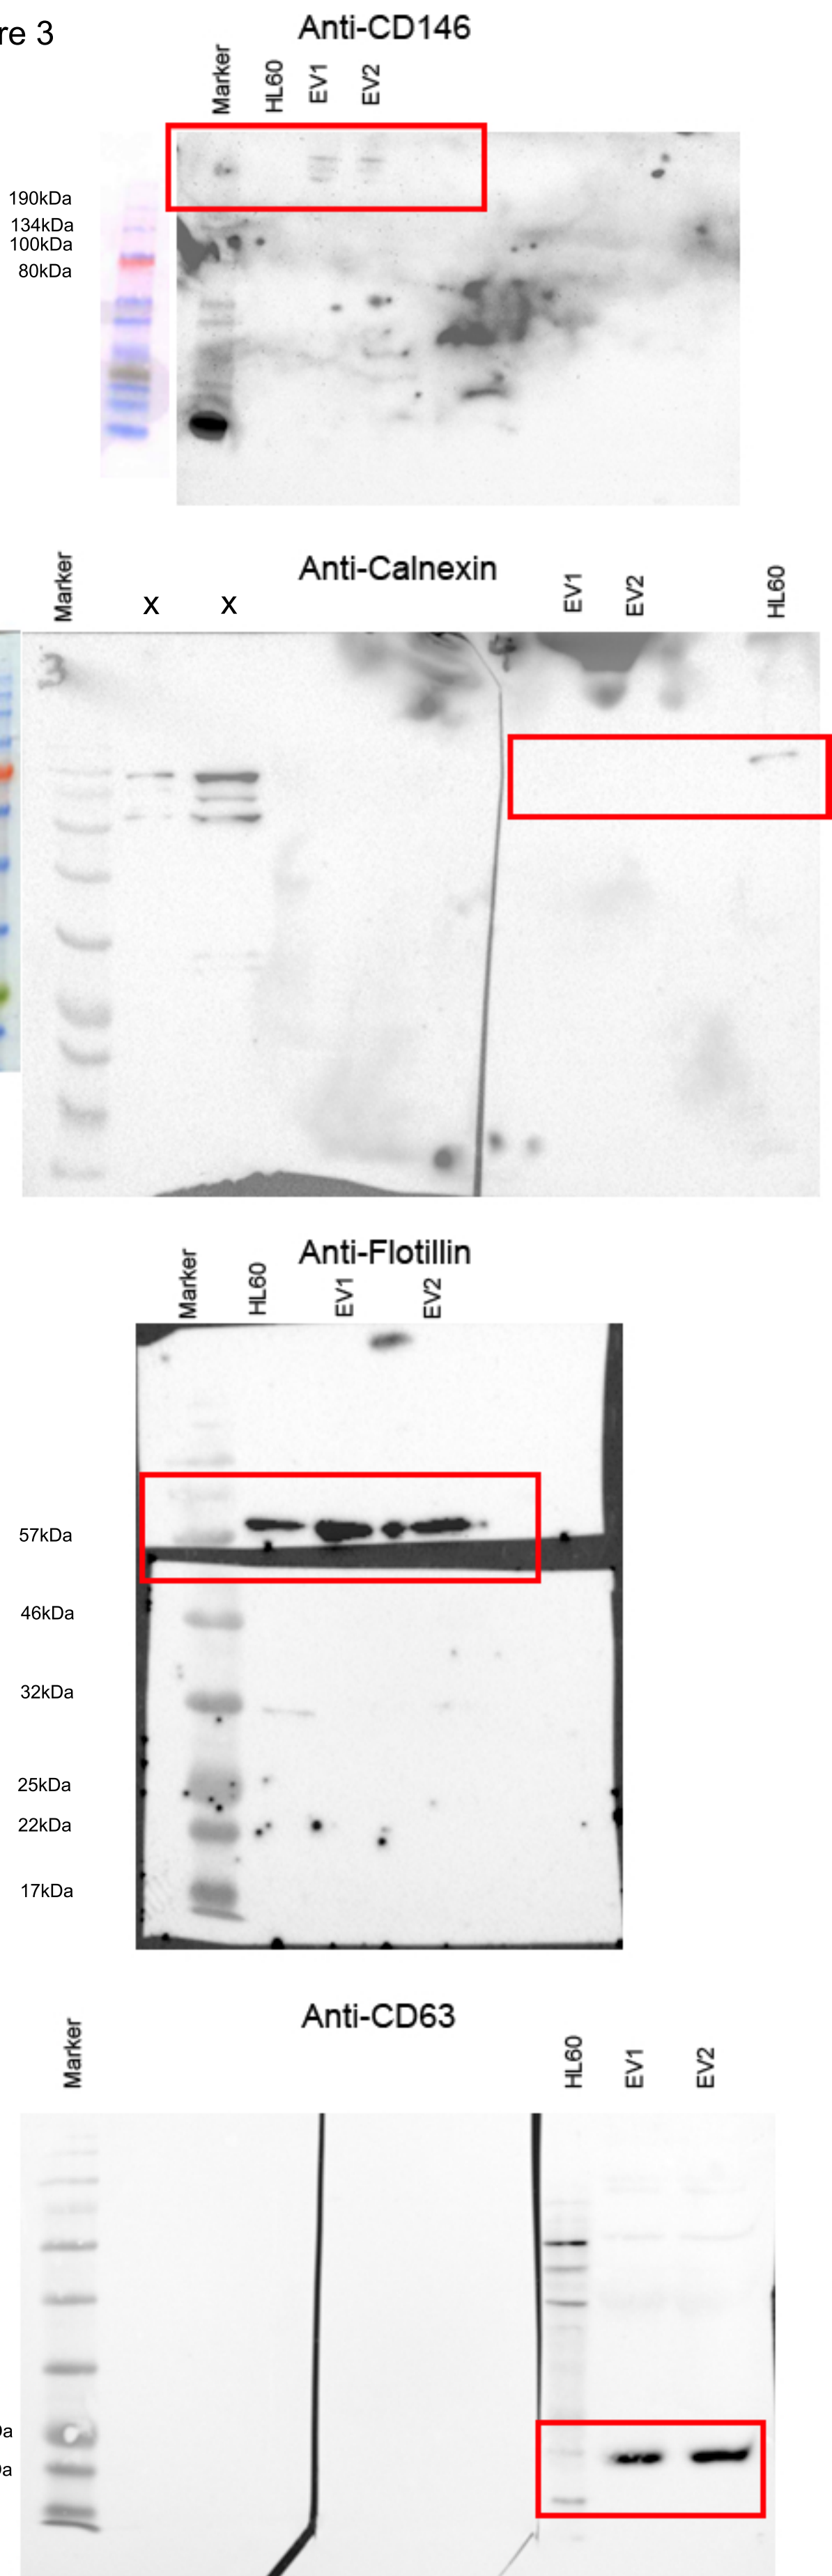

Supplement: pone.0228948.s002.pdf [file pone.0228948.s002.pdf]
